# Supplementary material for: Effect of a novel vital sign device on maternal mortality and morbidity in low-resource settings: a pragmatic, stepped-wedge, cluster-randomised controlled trial
Source: PubMed Central journal article supplement (PMC6379820; doi:10.1016/s2214-109x(18)30526-6), 2019-02-14
Supplement: mmc1.pdf [file mmc1.pdf]

# THE LANCET

## Global Health

### Supplementary appendix

This appendix formed part of the original submission and has been peer reviewed. We post it as supplied by the authors.

Supplement to: Vousden N, Lawley E, Nathan HL, et al. Effect of a novel vital sign device on maternal mortality and morbidity in low-resource settings: a pragmatic, stepped-wedge, cluster-randomised controlled trial. *Lancet Glob Health* 2019; 7: e347–56.

## **Appendix Content**

- |                                              |                 |
|----------------------------------------------|-----------------|
| <b>1. Ethical approval for clusters</b>      | <b>Page 2</b>   |
| <b>2. List of facilities in each cluster</b> | <b>Page 3-5</b> |
| <b>3. Alternate correlation models</b>       | <b>Page 6</b>   |
| <b>4. Affiliations of collaborators</b>      | <b>Page 7-8</b> |

## 1. Ethical Approval for Sites

| Country      | Cluster Primary Investigator and Affiliation                                                         | Ethics Approval Authority                                                                                                                                                                  | Ethics Approval Number                                               |
|--------------|------------------------------------------------------------------------------------------------------|--------------------------------------------------------------------------------------------------------------------------------------------------------------------------------------------|----------------------------------------------------------------------|
| Ethiopia     | Adrian Brown, Maternity Worldwide.                                                                   | Ethiopian Public Health Institute, Ethiopia                                                                                                                                                | EPHI6.4/185                                                          |
| Zimbabwe     | Francis Gidiri, University of Zimbabwe.                                                              | Medical Research Council of Zimbabwe; Zimbabwe.                                                                                                                                            | MRCZ/A/1999                                                          |
| Sierra Leone | Matthew Clarke, Welbodi Partnership, Freetown.                                                       | Office of the Sierra Leone Ethics and Scientific Review Committee Directorate of Training and Research, Connaught Hospital; Sierra Leone                                                   | Not provided                                                         |
| Haiti        | Carwyn Hill, Hope Health Action, Cap Haitien                                                         | Cap Haitien does not have a formal ethical review process, Memorandums of understanding were drawn up with each hospital trust and a letter of support gained from the Ministry of Health. | NA                                                                   |
| India        | Mrutyunjaya Bellad, Jawarharlal Nehru Medical College, KLE University, Belgaum.                      | K.L.E Society's Jawaharlal Nehru Medical College, Belgaum, India                                                                                                                           | MDC/IECHSR/2015-16/A-59; KLEU/EC/2016-17/A-95; KLEU/EC/2017-18-A-104 |
| Zambia       | Bellington Vwalika, University of Zambia, Lusaka; Sebastian Chinkoyo, Ndola Teaching Hopital, Ndola. | ERES Converge; Zambia                                                                                                                                                                      | 20215-Aug-008                                                        |
| Malawi       | Grace Makonyola, Maternity Worldwide.                                                                | National Health Sciences Research Committee at Zomba Central Hospital, Malawi                                                                                                              | NHSRC 15/11/1504                                                     |
| Uganda       | Julius Wandabwa, Sanyu Africa Research Institute, Mbale; Josephat Byamugisha, Makere University,     | Uganda National Council for Science and Technology; Uganda                                                                                                                                 | HS1953                                                               |

## 2. Trial Facilities in each cluster

| Cluster                | Tertiary Facilities                                           | Secondary Facilities                             | Primary Facilities                                                                                                                                                                                                                                                                                                                                                                                                                                                                                                                       |
|------------------------|---------------------------------------------------------------|--------------------------------------------------|------------------------------------------------------------------------------------------------------------------------------------------------------------------------------------------------------------------------------------------------------------------------------------------------------------------------------------------------------------------------------------------------------------------------------------------------------------------------------------------------------------------------------------------|
| Addis Ababa, Ethiopia  | St Paul's Hospital, Addis Ababa, Ethiopia                     | Ras Desta, Addis Ababa, Ethiopia                 | Selam Health Center (Woreda 9), Woreda 7 Health Centre (Gulele)/Hidasse, Woreda 10 Health Center (Gulele)/shegole, Free Methodist Health Center, Woreda 5 Health Center, Woreda 2 Health Center Michewe, Addis Ketema Health Center (Addis Ababa), Woreda 5/18 Health Center (Addis Ketema), Woreda 7 Health Center (Addis Ketema), Woreda 7 Health Center (Addis Ketema), Woreda 10 Addis Ketema, Woreda 5 Abebe Bikila, Ras Emiru Health center, Gulele Semen, Simgn Kebede, Kolfe Woreda 2, Addis Gebeya HC, Mikililand Health Centre |
| Harare, Zimbabwe       | Mbuya Nehanda Maternity Hospital, Harare, Zimbabwe            | Concession District Hospital<br>Makumbi Hospital | Henderson Clinic, Christon Bank Clinic, Nyabira Clinic, Gwebi College Clinic, Mount Hampden Clinic, Dzivarasekwa Extension Clinic, St Josephs Clinic, Mabvuku Polyclinic, Warren Park Polyclinic, Hatcliff Polyclinic, Rujeko (DZ) Polyclinic, Parirenyatwa City clinic, Tafara Clinic, Greendale Clinic, Eastlea Clinic, Highlands Clinic, Borrowdale Clinic, Mt Pleasant Clinic, Avondale Clinic, Belvedere Clinic, Mabelreign Clinic, Malborough Clinic                                                                               |
| Ndola, Zambia          | Ndola Teaching Hospital                                       | N/A                                              | Chipokota Mayamba Clinic, Chipulukusu Clinic, Commando Camp Clinic, Dola Hill Clinic, Itawa Clinic, Kabushi Clinic, Kalewa Clinic, Kaloko Clinic, Kaniki Clinic, Kawama Clinic, Lubuto Clinic, Main Masala Clinic, Mushili Clinic, Ndeke Clinic, New Masala Clinic, Nkwazi Clinic, Padmodzi Clinic, Peter Singogo Clinic, Prisons Clinic, Railway Surgery, St Dominic Mission Hospital, Tug Argan Clinic, Twapia Clinic                                                                                                                  |
| Freetown, Sierra Leone | Princess Christian Maternity Hospital, Freetown, Sierra Leone | Rokupa Government Hospital                       | Approve School CHC, Haja Neneh, Jenner Wright CHC, Kissy CHC, Konkay CHC, Kuntorloh CHC, Looking Town MCHP, Moyiba CHC, Principal Medical officer Clinic, Ross Road CHC, St. Joseph CHC                                                                                                                                                                                                                                                                                                                                                  |
| Cap Haitien, Haiti     | Fort Saint Michel Hopital, Convention Baptiste d'Haiti,       | Centre de Sante Quartier-Morin                   | Centre de Sante de Cadush, Centre de Sante de Morne Pele, Centre de Sante Labadie, Centre de Sante Limonade, Centre de Sante Porte Ouverte, Centre de Sante St Charles, Dispansaire St. Louis, Dispensaire de Grand Pre, Unite                                                                                                                                                                                                                                                                                                           |

|                |                               |                                                                                                                                                                                                                                                                                                                                                                                                                                                                                                                                                                                                                                       |                                                                                                                                                                                                                                                                                                                                                                                                                                                                                                                                                                                                                                                                                                                                                                                                                                                                                                                                                                                                                                                                                                                                                                                                                                                                                                                                                                                                                                                                                                                                                                                                                                                                            |
|----------------|-------------------------------|---------------------------------------------------------------------------------------------------------------------------------------------------------------------------------------------------------------------------------------------------------------------------------------------------------------------------------------------------------------------------------------------------------------------------------------------------------------------------------------------------------------------------------------------------------------------------------------------------------------------------------------|----------------------------------------------------------------------------------------------------------------------------------------------------------------------------------------------------------------------------------------------------------------------------------------------------------------------------------------------------------------------------------------------------------------------------------------------------------------------------------------------------------------------------------------------------------------------------------------------------------------------------------------------------------------------------------------------------------------------------------------------------------------------------------------------------------------------------------------------------------------------------------------------------------------------------------------------------------------------------------------------------------------------------------------------------------------------------------------------------------------------------------------------------------------------------------------------------------------------------------------------------------------------------------------------------------------------------------------------------------------------------------------------------------------------------------------------------------------------------------------------------------------------------------------------------------------------------------------------------------------------------------------------------------------------------|
|                | Justinian University Hospital |                                                                                                                                                                                                                                                                                                                                                                                                                                                                                                                                                                                                                                       | de Lutte pour la Sante (ULS), Centre de Sante de Madeline                                                                                                                                                                                                                                                                                                                                                                                                                                                                                                                                                                                                                                                                                                                                                                                                                                                                                                                                                                                                                                                                                                                                                                                                                                                                                                                                                                                                                                                                                                                                                                                                                  |
| Gokak, India   |                               | Al Shifa Hospital<br>Arogya hospital<br>Mudalgi<br>Arogya woman child Hospital,<br>Mahila and Childrens Hospital<br>Dhondiba Jadhav Memorial Hospital,<br>Dr Kattimani Hospital<br>Ganga surgical and Maternity Clinic<br>Gokak General Hospital<br>Gourishankar Hospital<br>Gokak<br>J G Cooperative Hospital<br>Jayaratna Hospital,<br>Kadagalikar Maternity and Children Hospital,<br>Kappalaguddi Hospital,<br>KHI Hospital<br>Masurkar Hospital,<br>Mudalgi CHC<br>Muragod Hospital,<br>Navajeevan Maternity & Nursing Home,<br>Nayakwadi Hospital,<br>Shanta Nursing and Maternity Home<br>Soubhagya Nursing and Maternity Home | Akkatangerhal SC Dasanatti,<br>Akkatangerhal (PHC+ Sub Centres AK Hal I & II, Akkatangerhal SC Iranatti, Akkatangerhal SC Panjanatti, Ankalagi (PHC+ Sub Centres I and II), Ankalagi SC Gujanal, Ankalagi SC Mallapur, Ankalagi SC Suladal, Bairanatti (PHC+ Sub Centres I), Bairanatti SC Sunadholi, Bairanatti SC Tigadi, Balobal SC Hunshyal, Balobal SC Sangankeri, Balobal ( PHC and SC I), Balobal SC Arabhavi, Balobal SC Lolatur, Betageri SC Chikkanandi, Betageri (PHC and SC I), Company Hospital Gokak Falls, Hallur (PHC and SCI and II), Hallur SC Khanatti, Kallolli (PHC and SC I, II), Khanagaon (PHC and SCI), Khanagaon SC DG Hatti, Khanagaon SC Shiltibhavi, Konnur (PHC SC I and II), Konnur SC Godachinamalki, Konnur SC Gokak Falls i and II, Konnur SC Melamatti, Konnur SC Nandagaon, Koujalagi (PHC and SC I and II), Koujalagi SC Kalliguddi, Kulagod (PHC SC I and II), Kulagod SC Dhavaleshwar, Mamadapur (PHC and SCI), Mamadapur SC Maradishivapur, Masaguppi (PHC SCI), Masaguppi SC Dharmatti, Masaguppi SC Vadratti, Melavanki PHC (PHC+ SC-1), Melavanki PHC -SC Maladinni, Melavanki PHC -SC Upparatti, Naganur (PHC SCI), Naganur SC Gurlapur, Naganur SC Mudalagi I and II, Sindhikurabet (PHC SC I and II), Sindhikurabet Ghataprabha I and II, Sindhikurabet SC Dupdhal, Sindhikurabet SC Duradundi, Talakatnal (PHC and SC), Talakatnal SC Gosabal, Talakatnal SC Uddagatti, Tavag (PHC SC I and II), Tavag SC Benachinamardi, Tavag SC Kolavi, Tavag SC Urabinatti, Tukkanatti (PHC SC), Tukkanatti SC PG Mallapur, Tukkanatti SC Rajapur, Yadawad (PHC and SC), Yadawad SC Avaradi, Yadawad SC Girisagar, Yadawad SC Yaragudri |
| Mulago, Uganda | Mulago and Kawempe Hospital   | Lubaga Hospital,<br>Mengo Hospital,<br>Nsambya Hospital                                                                                                                                                                                                                                                                                                                                                                                                                                                                                                                                                                               | Kawala Health Centre III, Kisenyi Health Centre, Kisugu Health Centre III, Kiswa Heaslth Centre III, Kitebi Health Centre III, Komamboga Health Centre III, Naguru general hospital, Naguru Teenage Centre, Kibuli Hospital                                                                                                                                                                                                                                                                                                                                                                                                                                                                                                                                                                                                                                                                                                                                                                                                                                                                                                                                                                                                                                                                                                                                                                                                                                                                                                                                                                                                                                                |
| Lusaka, Zambia | University Teaching Hospital  | Chainama, Chainda, Chawama, Kalingalinga, Kanyama,                                                                                                                                                                                                                                                                                                                                                                                                                                                                                                                                                                                    | Bauleni, Chaisa, Chazanga, Chelstone, Civic Center, George, Kabwata, Kamwala, Kaunda Square, Matero                                                                                                                                                                                                                                                                                                                                                                                                                                                                                                                                                                                                                                                                                                                                                                                                                                                                                                                                                                                                                                                                                                                                                                                                                                                                                                                                                                                                                                                                                                                                                                        |

|               |                        |                                                                      |                                                                                                                                                                                                                                                                                                                                                                                                                                                                                   |
|---------------|------------------------|----------------------------------------------------------------------|-----------------------------------------------------------------------------------------------------------------------------------------------------------------------------------------------------------------------------------------------------------------------------------------------------------------------------------------------------------------------------------------------------------------------------------------------------------------------------------|
|               |                        | Mtendere, Chilenje, Chipata, Levy Hospital, Matero Referral, Sikanze | Main, Ngombe, Prisons, Railway, State House, State Lodge                                                                                                                                                                                                                                                                                                                                                                                                                          |
| Zomba, Malawi | Zomba central Hospital | Balaka , Holy Family, Machinga, Mangochi, St Lukes, Pirimiti         | Chingale, Chipini, Magomero, Matawale, Matiya, Mayaka Namikango , Ntaja, Phalombe                                                                                                                                                                                                                                                                                                                                                                                                 |
| Mbale, Uganda |                        | Mbale regional referral hospital                                     | Ahamadiya. Atuturi hospital, Bubulo, Budadiri, Budaka<br>Bududa hospital, Bufumbo<br>Bugobero, Bukedea, Bukiende,<br>Bumadanda, Bumasike, Bunampogo,<br>Bungokho, Busano, Bushikori, Busiu,<br>Busolwe Hospital, Buwangwa, Kadama,<br>Kamonkoli, Kibuku, Kolonyi,<br>Lwangoli, Makhonje, Maluku, Mbale<br>prisons, Mt.elgon hospital, Naiku,<br>Nakaloke, Namakwekwe, Namanyonyi,<br>Namatala, Namawanga, Pallisa hospital,<br>Police 2, Siira HCIII, Sironko, Tirinyi,<br>Wanale |

### 3. Alternative Correlation Models Tested

| <b>Correlation Model</b> | <b>Planned Adjusted Comparison*<br/>(Trend &amp; Step)<br/>(Odds Ratio)</b> | <b>Adjusted Comparison* (Bent<br/>Stick)<br/>(Odds Ratio)</b> |
|--------------------------|-----------------------------------------------------------------------------|---------------------------------------------------------------|
| Ar 1                     | 1.12 (0.86-1.47)<br>0.39                                                    | 1.11 (0.80-1.54)<br>0.54                                      |
| Ar 5                     | 1.13 (0.85-1.51)<br>0.40                                                    | 1.17 (0.70-1.95)<br>0.70                                      |
| Exchangeable             | No convergence                                                              | No convergence                                                |
| Independent              | 1.32 (0.86-1.48)<br>0.37                                                    | 1.13 (0.81-1.57)<br>0.81                                      |
| Unstructured             | No convergence                                                              | No convergence                                                |
| Stationary 1             | 1.13 (0.86-1.47)<br>0.39                                                    | 1.11 (0.80-1.55)<br>0.53                                      |
| Stationary 5             | 1.11 (0.84-1.45)<br>0.48                                                    | No convergence                                                |
| Non-stationary 1         | No convergence                                                              | No convergence                                                |
| Non-stationary 5         | No convergence                                                              | No convergence                                                |

#### 4. Affiliations of Collaborators

| First name | Last name     | Affiliation                                                                                     |
|------------|---------------|-------------------------------------------------------------------------------------------------|
| Monice     | Kachinjika    | Maternity Worldwide, Zomba, Malawi                                                              |
| Doreen     | Bukani        | Maternity Worldwide, Zomba, Malawi                                                              |
| Jane       | Makwakwa      | Maternity Worldwide, Zomba, Malawi                                                              |
| Grace      | Makonyola     | Maternity Worldwide, Zomba, Malawi                                                              |
| Adrian     | Brown         | Maternity Worldwide, Community Base, 113 Queens Rd, Brighton BN1 3XG                            |
| Paul       | Toussaint     | Hope Health Action, Hopital Convention Baptiste d'Haiti, Cap Haitien, Haiti                     |
| Adeline    | Vixama        | Hope Health Action, Hopital Convention Baptiste d'Haiti, Cap Haitien, Haiti                     |
| Grace      | Greene        | Hope Health Action, Hopital Convention Baptiste d'Haiti, Cap Haitien, Haiti                     |
| Carwyn     | Hill          | Hope Health Action, Hopital Convention Baptiste d'Haiti, Cap Haitien, Haiti                     |
| Emily      | Nakiriija     | Department of Obstetrics and Gynaecology, Mulago Hospital, Makerere University, Kampala, Uganda |
| Doreen     | Birungi       | Department of Obstetrics and Gynaecology, Mulago Hospital, Makerere University, Kampala, Uganda |
| Noela      | Kalyowa       | Department of Obstetrics and Gynaecology, Mulago Hospital, Makerere University, Kampala, Uganda |
| Dorothy    | Namakula      | Department of Obstetrics and Gynaecology, Mulago Hospital, Makerere University, Kampala, Uganda |
| Josaphat   | Byamugisha    | Department of Obstetrics and Gynaecology, Mulago Hospital, Makerere University, Kampala, Uganda |
| Annettee   | Nakimuli      | Department of Obstetrics and Gynaecology, Mulago Hospital, Makerere University, Kampala, Uganda |
| Nathan     | Mackayi Odeke | Sanyu Africa Research Institute, Mbale Regional Referral Hospital, Mbale, Uganda                |
| James      | Ditai         | Sanyu Africa Research Institute, Mbale Regional Referral Hospital, Mbale, Uganda                |
| Julius     | Wandabwa      | Sanyu Africa Research Institute, Mbale Regional Referral Hospital, Mbale, Uganda                |
| Fatmata    | Momodou       | Welbodi Partnership, Ola During Childrens Hospital, Freetown, Sierra Leone                      |
| Margaret   | Sesay         | Welbodi Partnership, Ola During Childrens Hospital, Freetown, Sierra Leone                      |
| Patricia   | Sandi         | Welbodi Partnership, Ola During Childrens Hospital, Freetown, Sierra Leone                      |
| Jeneba     | Conteh        | Welbodi Partnership, Ola During Childrens Hospital, Freetown, Sierra Leone                      |
| Jesse      | Kamara        | Welbodi Partnership, Ola During Childrens Hospital, Freetown, Sierra Leone                      |
| Matthew    | Clarke        | Welbodi Partnership, Ola During Childrens Hospital, Freetown, Sierra Leone                      |
| Rebecca    | Best          | Welbodi Partnership, Ola During Childrens Hospital, Freetown, Sierra Leone                      |
| Josephine  | Miti          | Department of Obstetrics and Gynaecology, University of Zambia, Lusaka, Zambia                  |
| Mercy      | Kopeka        | Department of Obstetrics and Gynaecology, University of Zambia, Lusaka, Zambia                  |
| Bellington | Vwalika       | Department of Obstetrics and Gynaecology, University of Zambia, Lusaka, Zambia                  |
| Martina    | Chima         | Department of Obstetrics and Gynaecology, University of Zambia, Lusaka, Zambia                  |
| Thokozile  | Musonda       | Department of Obstetrics and Gynaecology, Ndola Teaching Hospital, Ndola, Zambia                |



|              |              |                                                                                                                                                                |
|--------------|--------------|----------------------------------------------------------------------------------------------------------------------------------------------------------------|
| Sebastian    | Chinkoyo     | Department of Obstetrics and Gynaecology, Ndola Teaching Hospital, Ndola, Zambia                                                                               |
| Christine    | Jere         | Department of Obstetrics and Gynaecology, Ndola Teaching Hospital, Ndola, Zambia                                                                               |
| Violet       | Mambo        | Department of Obstetrics and Gynaecology, College of Health Sciences, University of Zimbabwe, Zimbabwe                                                         |
| Yonas        | Guchale      | Maternity Worldwide, Addis Ababa, Ethiopia                                                                                                                     |
| Lomi         | Yadeta       | Maternity Worldwide, Addis Ababa, Ethiopia                                                                                                                     |
| Feiruz       | Surur        | Department of Obstetrics and Gynaecology, St. Pauls Hospital, Addis Ababa, Ethiopia                                                                            |
| Geetanjali M | Mungarwadi   | Women's and Children's Health Research Unit, KLE Academy of Higher Education and Research, Jawaharlal Nehru Medical College, Belgaum – 590010 Karnataka, India |
| Sphoorthi S  | Mastiholi    | Women's and Children's Health Research Unit, KLE Academy of Higher Education and Research, Jawaharlal Nehru Medical College, Belgaum – 590010 Karnataka, India |
| Chandrappa C | Karadiguddi  | Women's and Children's Health Research Unit, KLE Academy of Higher Education and Research, Jawaharlal Nehru Medical College, Belgaum – 590010 Karnataka, India |
| Umesh        | Charantimath | Women's and Children's Health Research Unit, KLE Academy of Higher Education and Research, Jawaharlal Nehru Medical College, Belgaum – 590010 Karnataka, India |
| Mrutyunjaya  | Bellad       | Women's and Children's Health Research Unit, KLE Academy of Higher Education and Research, Jawaharlal Nehru Medical College, Belgaum – 590010 Karnataka, India |
| Natasha      | Hezelgrave   | Department of Women and Children's Health, School of Life Course Sciences, Faculty of Life Sciences and Medicine, King's College London, London, SE1 7EH       |
| Kate E       | Duhig        | Department of Women and Children's Health, School of Life Course Sciences, Faculty of Life Sciences and Medicine, King's College London, London, SE1 7EH       |
